# Supplementary material for: Characteristic of Concurrent Uterine Lipoleiomyoma and Hemangioma by Algorithm of Candidate Biomarkers for Uterine Mesenchymal Tumor
Source: MDPI journal article supplement (doi:10.3390/diagnostics12102468), 2022-10-12
Supplement: s1 [file s1]

| Tumor type                           | Atypia   | Mitotic activity       | Necrosis              | Protein expression* |     |     |     |     |       |     |     |     |     |       |     |      | Cliical comments                          |
|--------------------------------------|----------|------------------------|-----------------------|---------------------|-----|-----|-----|-----|-------|-----|-----|-----|-----|-------|-----|------|-------------------------------------------|
|                                      |          |                        |                       | Cyt                 | Des | CAV | SMA | Vim | ER/PR | End | EGF | CyB | CyE | PSMB9 | Cal | Ki67 |                                           |
| Endometrial stromal tumors.          |          |                        |                       |                     |     |     |     |     |       |     |     |     |     |       |     |      |                                           |
| Endometrial stromal nodule           | minimal  | infrequent             | -/inconspicuous       | +                   | -   | ++  | +   | +   | +++   | +   | *   | +   | -   | ++    | ++  | -    | Absence of myometrial infiltration        |
| Endometrial stromal sarcoma          | -        | infrequent             | -/inconspicuous       | -/+                 | -   | ++  | +   | +   | +++   | +   | +   | +   | -   | -/+   | ++  | -/+  |                                           |
| Undifferentiated endometrial sarcoma | marked   | Frequent (atypical MF) | +                     | -/+                 | foc | *   | *   | -   | -     | +   | +   | +   | +   | -/+   | +   | +    | Lack specific differentiation             |
| Smooth muscle tumors                 |          |                        |                       |                     |     |     |     |     |       |     |     |     |     |       |     |      |                                           |
| Leiomyoma, NOS                       | -        | <5 MF/10HPF            | -                     | foc                 | +   | ++  | +   | *   | +++   | -/+ | -/+ | +   | -   | ++    | ++  | -/+  | Well-circumscribed                        |
| Mitotically active leiomyoma         | -        | >5 MF/10HPF            | -                     | *                   | +   | ++  | +   | *   | +++   | -/+ | -/+ | +   | -   | ++    | ++  | -/+  | Pseudocapsul                              |
| Cellular leiomyoma                   | -        | infrequent             | -                     | *                   | +   | ++  | +   | *   | +++   | -/+ | -/+ | +   | -   | ++    | ++  | -/+  | Increased cellularity                     |
| Hemorrhagic cellular leiomyoma       | -        | infrequent             | -                     | *                   | +   | ++  | +   | *   | +++   | -/+ | -/+ | +   | -   | ++    | ++  | -/+  | Hormone induced changes                   |
| Epithelioid leiomyoma                | -        | <5 MF/10HPF            | -                     | *                   | +   | ++  | +   | *   | +++   | -/+ | -/+ | *   | -   | ++    | ++  | -/+  | Epithelial-like cells                     |
| Myxoid leiomyoma                     | -        | <5 MF/10HPF            | -                     | *                   | *   | *   | *   | *   | *     | -/+ | -/+ | *   | +   | -/+   | +   | +    | Myxoid material                           |
| Atypical leiomyoma                   | moderate | <10 MF/10HPF           | -                     | -                   | +   | ++  | +   | *   | +++   | +   | -/+ | +   | +   | -/+   | -/+ | +    | Separates tumor cells                     |
| Lipoleiomyoma STUMP#                 | -        | infrequent             | -                     | *                   | +   | ++  | +   | *   | +++   | *   | -/+ | *   | +   | -/+   | *   | -/+  | Scattered adipocytes                      |
|                                      | -        | infrequent             | -                     | *                   | +   | ++  | +   | *   | *     | *   | -/+ | *   | -/+ | -/+   | *   | -/+  |                                           |
|                                      | -/+      | >10 MF/10HPF           | +/uncertain           | *                   | +   | ++  | +   | *   | *     | *   | -/+ | *   | -/+ | -/+   | *   | -/+  |                                           |
|                                      | Marked   | borderline             | -                     | *                   | +   | ++  | +   | *   | *     | *   | -/+ | *   | -/+ | -/+   | *   | -/+  |                                           |
|                                      | -        | infrequent             | +/-difficult classify | *                   | +   | ++  | +   | *   | *     | *   | -/+ | *   | -/+ | -/+   | *   | -/+  |                                           |
| Intravenous leiomyomatosis           | moderate | infrequent             | -                     | +                   | *   | ++  | +   | *   | *     | *   | *   | -/+ | -/+ | -     | -   | +    | Infiltrative                              |
| Leiomyosarcoma                       | moderate | >10 MF/10HPF           | +                     | +                   | +   | ++  | -/+ | -   | -     | +   | -/+ | ++  | +++ | -     | -   | ++   | Infiltrative                              |
| Leiomyosarcoma epithelioid variant   | moderate | >5 MF/10HPF            | +                     | +                   | +   | ++  | -/+ | -   | -     | +   | -/+ | ++  | +++ | -     | -   | ++   | Infiltrative, >50% epithelioid cells      |
| Leiomyosarcoma myxoid variant        | moderate | Any MF                 | +                     | +                   | +   | ++  | -/+ | -   | -     | +   | -/+ | ++  | ++  | -     | -   | ++   | Infiltrative, myxoid extracellular matrix |
| Leiomyomatoid tumors                 |          |                        |                       |                     |     |     |     |     |       |     |     |     |     |       |     |      |                                           |
| LANT#                                | absent   | frequent               | +                     | -                   | -   | +   | +   | +   | *     | *   | +   | *   | ++  | -     | -   | -/+  | NOTE1                                     |

|                                            |          |              |   |    |    |    |    |    |    |    |    |    |   |    |    |    |               |
|--------------------------------------------|----------|--------------|---|----|----|----|----|----|----|----|----|----|---|----|----|----|---------------|
| Hemangioma                                 | moderate | infrequent   | - |    |    |    |    |    |    |    |    |    |   |    |    |    | CD31 positive |
| <b>Origin is endometrial stromal cells</b> |          |              |   |    |    |    |    |    |    |    |    |    |   |    |    |    |               |
| rhabdomyosarcoma                           | moderate | >10 MF/10HPF | - | NA | NA | ++ | NA | NA | NA | NA | NA | NA | + | ++ | ++ | NA | ++            |

\*insufficient data or not applicable.

Cyt.; cytokeratin, Des.; Desmin, CAV; caveolin 1, SMA; smooth muscle actin, Vim.; vimentin, ER/PR; estrogen receptor/progesterone receptor, End.; Endoglin; CD105/TGFb receptor (stem cell marker), EGF, EGFR; epidermal growth factor receptor, CyB; cyclin B1, CyE; cyclin E, PSMB9; proteasome beta subunit 9, Cal.; calponin h1, CD56; neural cell adhesion molecule (N-CAM), WT-1; wilms tumor 1, NOS; not otherwise specified, MF; magnification factor, HPF; high power field, Foc.; focal, STUMP; smooth muscle tumors of uncertain malignant potential. Protein expression\*, estimated-protein expressions by immunoblot analysis, immunohistochemistry (IHC) and/or RT-PCR (quantitative-PCR), +/-; partial expression, +; expression, ++; medium expression, +++; high expression, -; no evidence of expression, ER/PR(ref.13), PSMB9 (ref.13,14), cyclin E(ref.13,14), calponin h1(ref.15), Ki-67(ref.13,14). STUMP#(ref.15,16). Cyclin E, PSMB9, calponin h1 are potential bio-marker for human uterine mesenchymal tumors. LANT#, leiomyomatoid angiomatous neuroendocrin tumour (LANT) is described as a dimorphic neurosecretory tumor with a leiomyomatous vascular component (ref.17). NOTE1, Low-grade neuroendocrine tumor possibly related to null cell adenoma.

### **Supplementary Table S1. Classification of human uterine mesenchymal tumors**
